# Supplementary material
Source: publisher figshare collection journal article supplement (https://sage.figshare.com/ndownloader/files/12370310)
Supplement: Supplementary file 1 [file 12370310]

## Online Appendix

### Contents

|       |                                                           |
|-------|-----------------------------------------------------------|
| p.1   | i. Media sample ownership information                     |
| p.5   | Table A1: U.S. civil society actor percentages            |
| p.6   | Table A2: U.S. foreign/international actor percentages    |
| p.7   | Table A3: U.S. investigative reporting percentages        |
| p.8   | Table A4: U.S. public affairs focus percentages           |
| p.9   | Table A5: Sweden civil society actor percentages          |
| p.10  | Table A6: Sweden foreign/international actor percentages  |
| p.11  | Table A7: Sweden investigative reporting percentages      |
| p.12  | Table A8: Sweden public affairs focus percentages         |
| p.13  | Table A9: France civil society actor percentages          |
| p.14  | Table A10: France foreign/international actor percentages |
| p.15  | Table A11: France investigative reporting percentages     |
| p.16  | Table A12: France public affairs focus percentages        |
| p.17  | Table A13: Civil society actor deviation indices          |
| p.18  | Table A14: Foreign/international actor deviation indices  |
| p.19  | Table A15: Investigative reporting deviation indices      |
| p. 20 | Table A16: Public affairs focus deviation indices         |

### **i. Media sample ownership information**

For the United States, stock market-traded outlets include ABC News (a leading television news network, owned by Disney); CNN (a leading cable news network, owned by Time Warner); Huffington Post (a leading online-only news organization, owned by Verizon); *Los Angeles Times* (a leading national newspaper, owned by Tronc, formerly known as Tribune Publishing Company); and *USA Today* (the largest circulation general interest newspaper and flagship of the Gannett newspaper chain). Dominant shareholder stock market-traded outlets include CBS News (leading television news network, majority owned by Sumner Redstone and his daughter); Fox News (leading cable news network, plurality-controlled by Rupert Murdoch and family); *New York Times* (leading national newspaper, voting shares controlled by the Sulzberger family trust); *Metro* (high-circulation free newspaper, controlled by Swedish company Kinnevik AB, plurality controlled by Verdere S.a.r.l.); and Slate (a leading online only news organization, owned by Graham Holdings Company, whose voting shares are controlled by the Graham family). Privately held outlets include BuzzFeed (leading online only news outlet privately owned by BuzzFeed Inc., with minority investments from multiple private equity firms); *Minneapolis Star-Tribune* (leading regional newspaper personally owned by Glen Taylor, owner of the Minnesota Timberwolves professional basketball team); *Washington Post* (personally owned by Jeff Bezos, founder of Amazon); and Vice (a leading multi-media news organization privately held with minority investments by A&E Networks, News Corporation, and various private equity groups). Civil society media include the *Christian Science Monitor* (owned by the Church of Christ, Scientist); CIR/Reveal (a nonprofit, online only investigative news network); MinnPost (a nonprofit,

online-only regional news organization); ProPublica (a nonprofit, online-only national news organization); and Texas Tribune (a nonprofit, online-only regional news organization). Public, (partially) taxpayer-funded outlets include PBS (television) and NPR (radio), both effectively owned by the federal government-created Corporation for Public Broadcasting.

For Sweden, the only stock market traded outlet included is *Svenska Dagbladet* (a leading daily national newspaper, owned by Schibsted ASA, a Norwegian media group); the only dominant shareholder outlet included is *Metro* (a high-circulation free daily newspaper, owned by Swedish Investment Company Kinnevik AB). Privately held outlets include *Dagens Nyheter* (a leading national but Stockholm-oriented daily newspaper, owned by Bonnier AB, a Swedish company owned by the Bonnier family); *ETC.* (a left-wing daily, owned by ETC. förlag, which is owned by Johan Ehrenberg, who is also the editor-in-chief of ETC.); *Göteborgs-Posten* (a liberal daily newspaper, whose primary focus is the city of Gothenburg and the surrounding area, owned by the Stampen Local Media AB company, a subsidiary to Stampen AB media group); Kit.se (a site which publishes its articles via Facebook, similar to BuzzFeed in style, also owned by Bonnier AB); *Jönköpings-Posten*, (a local daily newspaper with liberal views owned by the Hall Press Group, whose majority shareholders are the Hamrin family); and Nyheter24 (a free daily, web-only newspaper, owned by 24 Media Network AB). Civil society outlets include Christian newspaper *Dagen* (owned by Norwegian Christian media company Mentor Medier, which in turn is owned by various Christian organizations); *Norran* (a daily, local newspaper based in Skellefteå, owned by the foundation Skelleftepress); *Barometern* (a daily, local newspaper published in Kalmar,

owned by Gota Media AB, which is in turn owned by two foundations, Stiftelsen Barometern and Tore G Wärenstams stiftelse); *Gefle Dagblad* (a local daily newspaper, owned by the Mittmedia Media Group, which is in turn owned by two foundations, the Stiftelsen Pressorganisation and Nya Stiftelsen Gefle Dagblad); and *Dagens Arena* (a left-oriented daily web-only newspaper, owned by Arena Medier AB, a corporation owned by the nonprofit association Arenagruppen). Public media outlets include Sr.se (Radio Sweden's website) and svt.se (Swedish Television Broadcasting Company's website).

For France, the only pure stock market traded outlet is TF1 (the largest audience television channel, owned by the stock market traded Bouygues S.A.); dominant shareholder outlets include *Metro* (a high-circulation free daily newspaper, owned by Swedish Investment Company Kinnevik AB), *Le Huffington Post* (jointly owned by publicly traded Verizon [owner of Huffington Post Co.], Le Monde Group, and Lazard investment banker Matthieu Pigasse's holding company, Les Nouvelles Editions Indépendantes), and *Le Figaro* (owned by Serge Dassault's Dassault Group, of which one of the largest assets is the stock market traded Dassault Aviation). Privately held outlets include *Le Monde* (leading national newspaper, owned by three outside investors); *Ouest-France* (a unique ownership model somewhere between privately held and nonprofit, in which a limited liability company is in turn owned by a nonprofit association, which cannot be sold); Rue89 (France's first major online-only news website, owned by *Le Nouvel Observateur* Group); Slate.fr (50 percent owned by four prominent French journalists, including former *Le Monde* director Jean-Marie Colombani, and 15 percent owned by the U.S. Slate Group [in turn owned by Graham Holdings], with other diverse

investors); Vice.fr (owned by Vice U.S. privately-held company); and *Libération* (owned by Patrick Drahi, principal investor in French telecommunications company SFR-Numericable). Civil society media include *La Croix* (a Catholic newspaper owned by nonprofit religious publisher Bayard, owned in turn by the Roman Catholic Assumptionist Order); *L'Humanité* (majority owned by the French communist party, but no longer the official organ of the party, supplemented by private equity investors); and Mediapart (an online-only investigative news website, founded by former *Le Monde* editor Edwy Plenel and other journalists (technically, a commercial enterprise relying entirely on subscriptions, it is included here as civil society because all of its profits are reinvested into the news operation). Taxpayer-supported public media include France 2 (the largest public television channel, Francetvinfo website) and France Info (the major public news radio station).

**Table A1: U.S. civil society actor percentages, by outlet and ownership type**

| US Civil Society Actors |                           |             |     |
|-------------------------|---------------------------|-------------|-----|
| Ownership Type          | News Outlet               | Percentages | N   |
| Stock Market Traded     | ABC News                  | 19.2%       | 442 |
|                         | CNN                       | 16.8%       | 606 |
|                         | Huffington Post           | 23.2%       | 607 |
|                         | LA Times                  | 13.5%       | 572 |
|                         | USA Today                 | 21.9%       | 661 |
|                         | AVG                       | 18.9%       |     |
| Dominant Share          | Metro                     | 22.2%       | 424 |
|                         | CBS News                  | 18.0%       | 449 |
|                         | Fox News                  | 15.5%       | 631 |
|                         | NY Times                  | 13.9%       | 648 |
|                         | Slate                     | 23.3%       | 674 |
|                         | AVG                       | 18.6%       |     |
| Total Stock Market      |                           | 18.8%       |     |
| Privately Held          | BuzzFeed                  | 26.6%       | 627 |
|                         | Minneapolis Star Tribune  | 15.4%       | 636 |
|                         | Washington Post           | 16.3%       | 687 |
|                         | Vice                      | 22.3%       | 640 |
|                         | AVG                       | 20.2%       |     |
| Civil Society           | Christian Science Monitor | 19.5%       | 620 |
|                         | CIR/Reveal                | 31.3%       | 396 |
|                         | MinnPost                  | 35.5%       | 606 |
|                         | ProPublica                | 42.5%       | 386 |
|                         | Texas Tribune             | 16.6%       | 627 |
|                         | AVG                       | 29.1%       |     |
| Public Media            | NPR                       | 17.8%       | 443 |
|                         | PBS                       | 35.9%       | 499 |
|                         | AVG                       | 26.9%       |     |
|                         | US AVG                    | 22.2%       |     |

**Table A2: U.S. foreign/international actor percentages**

| US Foreign/International Actors |                           |             |     |
|---------------------------------|---------------------------|-------------|-----|
| Ownership Type                  | News Outlet               | Percentages | N   |
| Stock Market Traded             | ABC News                  | 12.0%       | 442 |
|                                 | CNN                       | 18.5%       | 606 |
|                                 | Huffington Post           | 15.8%       | 607 |
|                                 | LA Times                  | 4.9%        | 572 |
|                                 | USA Today                 | 16.5%       | 661 |
|                                 | AVG                       | 13.5%       |     |
| Dominant Share                  | Metro                     | 5.9%        | 424 |
|                                 | CBS News                  | 11.6%       | 449 |
|                                 | Fox News                  | 14.7%       | 631 |
|                                 | NY Times                  | 17.0%       | 648 |
|                                 | Slate                     | 5.9%        | 674 |
|                                 | AVG                       | 11.0%       |     |
| Total Stock Market              |                           | 12.3%       |     |
| Privately Held                  | BuzzFeed                  | 10.5%       | 627 |
|                                 | Minneapolis Star Tribune  | 4.9%        | 636 |
|                                 | Washington Post           | 16.0%       | 687 |
|                                 | Vice                      | 38.3%       | 640 |
|                                 | AVG                       | 17.4%       |     |
| Civil Society                   | Christian Science Monitor | 45.0%       | 620 |
|                                 | CIR/Reveal                | 5.3%        | 396 |
|                                 | MinnPost                  | 3.6%        | 606 |
|                                 | ProPublica                | 6.0%        | 386 |
|                                 | Texas Tribune             | 2.7%        | 627 |
|                                 | AVG                       | 12.5%       |     |
| Public Media                    | NPR                       | 16.9%       | 443 |
|                                 | PBS                       | 7.8%        | 499 |
|                                 | AVG                       | 12.4%       |     |
|                                 | US AVG                    | 13.3%       |     |

**Table A3: U.S. investigative reporting percentages**

| US Investigative Reporting |                           |             |    |
|----------------------------|---------------------------|-------------|----|
| Ownership Type             | News Outlet               | Percentages | N  |
| Stock Market Traded        | ABC News                  | 0.0%        | 60 |
|                            | CNN                       | 1.3%        | 75 |
|                            | Huffington Post           | 5.3%        | 75 |
|                            | LA Times                  | 3.0%        | 67 |
|                            | USA Today                 | 2.7%        | 75 |
|                            | AVG                       | 2.5%        |    |
| Dominant Share             | Metro                     | 0.0%        | 50 |
|                            | CBS News                  | 0.0%        | 55 |
|                            | Fox News                  | 0.0%        | 75 |
|                            | NY Times                  | 1.3%        | 75 |
|                            | Slate                     | 0.0%        | 72 |
|                            | AVG                       | 0.3%        |    |
| Total Stock Market         |                           | 1.4%        |    |
| Privately Held             | BuzzFeed                  | 2.9%        | 69 |
|                            | Minneapolis Star Tribune  | 1.3%        | 75 |
|                            | Washington Post           | 4.0%        | 75 |
|                            | Vice                      | 0.0%        | 75 |
|                            | AVG                       | 2.1%        |    |
| Civil Society              | Christian Science Monitor | 0.0%        | 75 |
|                            | CIR/Reveal                | 62.7%       | 51 |
|                            | MinnPost                  | 2.7%        | 74 |
|                            | ProPublica                | 40.9%       | 44 |
|                            | Texas Tribune             | 0.0%        | 74 |
|                            | AVG                       | 21.3%       |    |
| Public Media               | NPR                       | 0.0%        | 50 |
|                            | PBS                       | 0.0%        | 60 |
|                            | AVG                       | 0.0%        |    |
|                            | US AVG                    | 6.1%        |    |

**Table A4: U.S. public affairs focus percentages**

| US Public Affairs Focus |                           |             |    |
|-------------------------|---------------------------|-------------|----|
| Ownership Type          | News Outlet               | Percentages | N  |
| Stock Market Traded     | ABC News                  | 20.0%       | 60 |
|                         | CNN                       | 38.7%       | 75 |
|                         | Huffington Post           | 44.0%       | 75 |
|                         | LA Times                  | 44.8%       | 67 |
|                         | USA Today                 | 41.3%       | 75 |
|                         | AVG                       | 37.8%       |    |
| Dominant Share          | Metro                     | 16.0%       | 50 |
|                         | CBS News                  | 30.9%       | 55 |
|                         | Fox News                  | 36.0%       | 75 |
|                         | NY Times                  | 54.7%       | 75 |
|                         | Slate                     | 55.6%       | 72 |
|                         | AVG                       | 38.6%       |    |
| Total Stock Market      |                           | 38.2%       |    |
| Privately Held          | BuzzFeed                  | 13.0%       | 69 |
|                         | Minneapolis Star Tribune  | 38.7%       | 75 |
|                         | Washington Post           | 52.0%       | 75 |
|                         | Vice                      | 38.7%       | 75 |
|                         | AVG                       | 35.6%       |    |
| Civil Society           | Christian Science Monitor | 53.3%       | 75 |
|                         | CIR/Reveal                | 43.1%       | 51 |
|                         | MinnPost                  | 50.0%       | 74 |
|                         | ProPublica                | 40.9%       | 44 |
|                         | Texas Tribune             | 77.0%       | 74 |
|                         | AVG                       | 52.9%       |    |
| Public Media            | NPR                       | 44.0%       | 50 |
|                         | PBS                       | 46.7%       | 60 |
|                         | AVG                       | 45.3%       |    |
|                         | US AVG                    | 41.9%       |    |

**Table A5: Sweden civil society actor percentages**

| Sweden Civil Society Actors |                            |                     |     |
|-----------------------------|----------------------------|---------------------|-----|
| Ownership Type              | News Outlet                | Civil Society Actor | N   |
| Stock Market Traded         | Svenska Dagbladet          | 18.5%               | 710 |
| Dominant Share              | Metro                      | 32.6%               | 639 |
| Total Stock Market          |                            | 25.6%               |     |
| Privately Held              | Dagens Nyheter             | 26.8%               | 653 |
|                             | ETC.                       | 31.5%               | 664 |
|                             | Goteborgs-Posten           | 12.5%               | 609 |
|                             | Kit.se                     | 34.7%               | 547 |
|                             | Jonkopings-Posten          | 12.5%               | 593 |
|                             | Nyheter24                  | 39.9%               | 631 |
|                             | AVG                        | 26.3%               |     |
| Civil Society               | Dagen                      | 54.6%               | 659 |
|                             | Barometern                 | 15.8%               | 603 |
|                             | Dagens Arena               | 32.5%               | 603 |
|                             | Gefle<br>Dagblad/Mittmedia | 28.9%               | 664 |
|                             | Norran                     | 17.1%               | 624 |
|                             | AVG                        | 29.8%               |     |
| Public Media                | sr.se                      | 24.1%               | 688 |
|                             | svt.se                     | 25.0%               | 660 |
|                             | AVG                        | 24.6%               |     |
|                             | Sweden AVG                 | 27.1%               |     |

**Table A6: Sweden foreign/international actor percentages**

| Sweden Foreign/International Actors |                            |              |     |
|-------------------------------------|----------------------------|--------------|-----|
| Ownership Type                      | News Outlet                | ForInt Actor | N   |
| Stock Market Traded                 | Svenska Dagbladet          | 30.8%        | 710 |
| Dominant Share                      | Metro                      | 32.6%        | 639 |
| Total Stock Market                  |                            | 31.7%        |     |
| Privately Held                      | Dagens Nyheter             | 31.7%        | 653 |
|                                     | ETC.                       | 29.5%        | 664 |
|                                     | Goteborgs-Posten           | 20.5%        | 609 |
|                                     | Kit.se                     | 21.0%        | 547 |
|                                     | Jonkopings-Posten          | 7.6%         | 593 |
|                                     | Nyheter24                  | 37.1%        | 631 |
|                                     | AVG                        | 24.6%        |     |
| Civil Society                       | Dagen                      | 32.6%        | 659 |
|                                     | Barometern                 | 10.9%        | 603 |
|                                     | Dagens Arena               | 17.1%        | 603 |
|                                     | Gefle<br>Dagblad/Mittmedia | 12.7%        | 664 |
|                                     | Norran                     | 7.2%         | 624 |
|                                     | AVG                        | 16.1%        |     |
| Public Media                        | sr.se                      | 38.4%        | 688 |
|                                     | svt.se                     | 33.0%        | 660 |
|                                     | AVG                        | 35.7%        |     |
|                                     | Sweden AVG                 | 24.2%        |     |

**Table A7: Sweden investigative reporting percentages**

| Sweden Investigative Reporting |                         |      |    |
|--------------------------------|-------------------------|------|----|
| Ownership Type                 | News Outlet             |      | N  |
| Stock Market Traded            | Svenska Dagbladet       | 1.3% | 75 |
| Dominant Share                 | Metro                   | 0.0% | 75 |
| Total Stock Market             |                         | 0.7% |    |
| Privately Held                 | Dagens Nyheter          | 0.0% | 75 |
|                                | ETC.                    | 1.3% | 75 |
|                                | Goteborgs-Posten        | 0.0% | 75 |
|                                | Kit.se                  | 0.0% | 75 |
|                                | Jonkopings-Posten       | 0.0% | 75 |
|                                | Nyheter24               | 0.0% | 75 |
|                                | AVG                     | 0.2% |    |
| Civil Society                  | Dagen                   | 0.0% | 75 |
|                                | Barometern              | 2.7% | 75 |
|                                | Dagens Arena            | 4.0% | 75 |
|                                | Gefle Dagblad/Mittmedia | 2.7% | 75 |
|                                | Norran                  | 0.0% | 75 |
|                                | AVG                     | 1.9% |    |
| Public Media                   | sr.se                   | 4.0% | 75 |
|                                | svt.se                  | 2.7% | 75 |
|                                | AVG                     | 3.3% |    |
|                                | Sweden AVG              | 1.2% |    |

**Table A8: Sweden public affairs focus percentages**

| Sweden Public Affairs Focus |                            |             |    |
|-----------------------------|----------------------------|-------------|----|
| Ownership Type              | News Outlet                | Percentages | N  |
| Stock Market Traded         | Svenska Dagbladet          | 40.0%       | 75 |
| Dominant Share              | Metro                      | 37.3%       | 75 |
| Total Stock Market          |                            | 38.7%       |    |
| Privately Held              | Dagens Nyheter             | 37.3%       | 75 |
|                             | ETC.                       | 49.3%       | 75 |
|                             | Goteborgs-Posten           | 45.3%       | 75 |
|                             | Kit.se                     | 20.0%       | 75 |
|                             | Jonkopings-Posten          | 44.0%       | 75 |
|                             | Nyheter24                  | 12.0%       | 75 |
|                             | AVG                        | 34.7%       |    |
| Civil Society               | Dagen                      | 45.3%       | 75 |
|                             | Barometern                 | 46.7%       | 75 |
|                             | Dagens Arena               | 70.7%       | 75 |
|                             | Gefle<br>Dagblad/Mittmedia | 26.7%       | 75 |
|                             | Norran                     | 41.3%       | 75 |
|                             | AVG                        | 46.1%       |    |
| Public Media                | sr.se                      | 50.7%       | 75 |
|                             | svt.se                     | 25.3%       | 75 |
|                             | AVG                        | 38.0%       |    |
|                             | Sweden AVG                 | 39.5%       |    |

**Table A9: France civil society actor percentages**

| France Civil Society Actors |                    |             |     |
|-----------------------------|--------------------|-------------|-----|
| Ownership Type              | News Outlet        | Percentages | N   |
| Stock Market Traded         | TF1                | 29.7%       | 380 |
| Dominant Share              | Metro              | 41.6%       | 356 |
|                             | Le Huffington Post | 27.8%       | 580 |
|                             | Le Figaro          | 26.5%       | 634 |
|                             | AVG                | 32.0%       |     |
| Total Stock Market          |                    | 31.4%       |     |
| Privately Held              | Le Monde           | 23.8%       | 622 |
|                             | Ouest-France       | 18.2%       | 517 |
|                             | Rue89              | 34.6%       | 500 |
|                             | Slate.fr           | 37.8%       | 563 |
|                             | Vice France        | 25.6%       | 289 |
|                             | Liberation         | 31.7%       | 628 |
|                             | AVG                | 28.6%       |     |
| Civil Society               | La Croix           | 19.3%       | 429 |
|                             | L'Humanite         | 35.1%       | 610 |
|                             | Mediapart          | 20.3%       | 718 |
|                             | AVG                | 24.9%       |     |
| Public Media                | Francetvinfo.com   | 28.0%       | 397 |
|                             | France info        | 26.5%       | 396 |
|                             | AVG                | 27.3%       |     |
|                             | France AVG         | 28.4%       |     |

**Table A10: France foreign/international actor percentages**

| France Foreign/International Actors |                    |             |     |
|-------------------------------------|--------------------|-------------|-----|
| Ownership Type                      | News Outlet        | Percentages | N   |
| Stock Market Traded                 | TF1                | 34.7%       | 380 |
| Dominant Share                      | Metro              | 25.8%       | 356 |
|                                     | Le Huffington Post | 33.6%       | 580 |
|                                     | Le Figaro          | 36.4%       | 634 |
|                                     | AVG                | 31.9%       |     |
| Total Stock Market                  |                    | 32.6%       |     |
| Privately Held                      | Le Monde           | 50.0%       | 622 |
|                                     | Ouest-France       | 24.2%       | 517 |
|                                     | Rue89              | 59.6%       | 500 |
|                                     | Slate.fr           | 54.0%       | 563 |
|                                     | Vice France        | 58.5%       | 289 |
|                                     | Liberation         | 45.9%       | 628 |
|                                     | AVG                | 48.7%       |     |
| Civil Society                       | La Croix           | 37.3%       | 429 |
|                                     | L'Humanite         | 20.7%       | 610 |
|                                     | Mediapart          | 33.3%       | 718 |
|                                     | AVG                | 30.4%       |     |
| Public Media                        | Francetvinfo.com   | 20.2%       | 397 |
|                                     | France info        | 29.5%       | 396 |
|                                     | AVG                | 24.9%       |     |
|                                     | France AVG         | 37.6%       |     |

**Table A11: France investigative reporting percentages**

| France Investigative Reporting |                    |             |    |
|--------------------------------|--------------------|-------------|----|
| Ownership Type                 | News Outlet        | Percentages | N  |
| Stock Market Traded            | TF1                | 0.0%        | 43 |
| Dominant Share                 | Metro              | 2.3%        | 44 |
|                                | Le Huffington Post | 0.0%        | 73 |
|                                | Le Figaro          | 0.0%        | 74 |
|                                | AVG                | 0.8%        |    |
| Total Stock Market             |                    | 0.6%        |    |
| Privately Held                 | Le Monde           | 4.1%        | 73 |
|                                | Ouest-France       | 0.0%        | 76 |
|                                | Rue89              | 0.0%        | 57 |
|                                | Slate.fr           | 0.0%        | 68 |
|                                | Vice France        | 0.0%        | 36 |
|                                | Liberation         | 1.4%        | 72 |
|                                | AVG                | 0.9%        |    |
| Civil Society                  | La Croix           | 1.6%        | 64 |
|                                | L'Humanite         | 0.0%        | 74 |
|                                | Mediapart          | 6.8%        | 73 |
|                                | AVG                | 2.8%        |    |
| Public Media                   | Francetvinfo.com   | 2.0%        | 50 |
|                                | France info        | 0.0%        | 49 |
|                                | AVG                | 1.0%        |    |
|                                | France AVG         | 1.2%        |    |

**Table A12: France public affairs focus percentages**

| France Public Affairs Focus |                    |             |    |
|-----------------------------|--------------------|-------------|----|
| Ownership Type              | News Outlet        | Percentages | N  |
| Stock Market Traded         | TF1                | 14.0%       | 43 |
| Dominant Share              | Metro              | 31.8%       | 44 |
|                             | Le Huffington Post | 34.2%       | 73 |
|                             | Le Figaro          | 47.3%       | 74 |
|                             | AVG                | 37.8%       |    |
| Total Stock Market          |                    | 31.8%       |    |
| Privately Held              | Le Monde           | 43.8%       | 73 |
|                             | Ouest-France       | 38.2%       | 76 |
|                             | Rue89              | 28.1%       | 57 |
|                             | Slate.fr           | 29.4%       | 68 |
|                             | Vice France        | 50.0%       | 36 |
|                             | Liberation         | 54.2%       | 72 |
|                             | AVG                | 40.6%       |    |
| Civil Society               | La Croix           | 46.9%       | 64 |
|                             | L'Humanite         | 52.7%       | 74 |
|                             | Mediapart          | 34.2%       | 73 |
|                             | AVG                | 44.6%       |    |
| Public Media                | Francetvinfo.com   | 22.0%       | 50 |
|                             | France info        | 16.3%       | 49 |
|                             | AVG                | 19.2%       |    |
|                             | France AVG         | 36.2%       |    |

**Table A13: Civil society actor deviation indices**

| Civil Society Actor DIs        |       |                                |       |                                |       |
|--------------------------------|-------|--------------------------------|-------|--------------------------------|-------|
| US                             |       | Sweden                         |       | France                         |       |
| Stock Market Traded            | 0.049 | Stock Market Traded            | NA    | Stock Market Traded            | NA    |
| Dominant Shareholder           | 0.051 | Dominant Shareholder           | NA    | Dominant Shareholder           | 0.101 |
| Total Stock Market Traded      | 0.045 | Total Stock Market Traded      | 0.141 | Total Stock Market Traded      | 0.079 |
| Privately Held                 | 0.066 | Privately Held                 | 0.139 | Privately Held                 | 0.091 |
| Civil Society                  | 0.136 | Civil Society                  | 0.186 | Civil Society                  | 0.105 |
| Public Media                   | 0.181 | Public Media                   | 0.009 | Public Media                   | 0.015 |
| Privately Held + Civil Society | 0.113 | Privately Held + Civil Society | 0.15  | Privately Held + Civil Society | 0.09  |
| Civil Society + Public Media   | 0.124 | Civil Society + Public Media   | 0.145 | Civil Society + Public Media   | 0.079 |
| US Overall                     | 0.086 | Sweden Overall                 | 0.129 | France Overall                 | 0.08  |

**Table A14: Foreign/international actor deviation indices**

| Foreign/International Actor DIs |       |                                |       |                                |       |
|---------------------------------|-------|--------------------------------|-------|--------------------------------|-------|
| US                              |       | Sweden                         |       | France                         |       |
| Stock Market Traded             | 0.063 | Stock Market Traded            | NA    | Stock Market Traded            | NA    |
| Dominant Shareholder            | 0.062 | Dominant Shareholder           | NA    | Dominant Shareholder           | 0.071 |
| Total Stock Market Traded       | 0.06  | Total Stock Market Traded      | 0.018 | Total Stock Market Traded      | 0.055 |
| Privately Held                  | 0.176 | Privately Held                 | 0.126 | Privately Held                 | 0.146 |
| Civil Society                   | 0.174 | Civil Society                  | 0.114 | Civil Society                  | 0.111 |
| Public Media                    | 0.091 | Public Media                   | 0.054 | Public Media                   | 0.093 |
| Privately Held + Civil Society  | 0.167 | Privately Held + Civil Society | 0.127 | Privately Held + Civil Society | 0.174 |
| Civil Society + Public Media    | 0.149 | Civil Society + Public Media   | 0.15  | Civil Society + Public Media   | 0.094 |
| US Overall                      | 0.108 | Sweden Overall                 | 0.127 | France Overall                 | 0.154 |

**Table A15: Investigative reporting deviation indices**

| Investigative Reporting DIs    |       |                                |       |                                |       |
|--------------------------------|-------|--------------------------------|-------|--------------------------------|-------|
| US                             |       | Sweden                         |       | France                         |       |
| Stock Market Traded            | 0.025 | Stock Market Traded            | NA    | Stock Market Traded            | NA    |
| Dominant Shareholder           | 0.005 | Dominant Shareholder           | NA    | Dominant Shareholder           | 0.015 |
| Total Stock Market Traded      | 0.02  | Total Stock Market Traded      | 0.013 | Total Stock Market Traded      | 0.011 |
| Privately Held                 | 0.023 | Privately Held                 | 0.004 | Privately Held                 | 0.016 |
| Civil Society                  | 0.333 | Civil Society                  | 0.021 | Civil Society                  | 0.046 |
| Public Media                   | 0     | Public Media                   | 0.013 | Public Media                   | 0.02  |
| Privately Held + Civil Society | 0.213 | Privately Held + Civil Society | 0.015 | Privately Held + Civil Society | 0.026 |
| Civil Society + Public Media   | 0.26  | Civil Society + Public Media   | 0.019 | Civil Society + Public Media   | 0.031 |
| US Overall                     | 0.107 | Sweden Overall                 | 0.017 | France Overall                 | 0.019 |

**Table A16: Public affairs focus deviation indices**

| Public Affairs Focus DIs       |       |                                |       |                                |       |
|--------------------------------|-------|--------------------------------|-------|--------------------------------|-------|
| US                             |       | Sweden                         |       | France                         |       |
| Stock Market Traded            | 0.110 | Stock Market Traded            | NA    | Stock Market Traded            | NA    |
| Dominant Shareholder           | 0.206 | Dominant Shareholder           | NA    | Dominant Shareholder           | 0.103 |
| Total Stock Market Traded      | 0.154 | Total Stock Market Traded      | 0.027 | Total Stock Market Traded      | 0.171 |
| Privately Held                 | 0.195 | Privately Held                 | 0.18  | Privately Held                 | 0.132 |
| Civil Society                  | 0.165 | Civil Society                  | 0.187 | Civil Society                  | 0.123 |
| Public Media                   | 0.027 | Public Media                   | 0.253 | Public Media                   | 0.057 |
| Privately Held + Civil Society | 0.186 | Privately Held + Civil Society | 0.178 | Privately Held + Civil Society | 0.119 |
| Civil Society + Public Media   | 0.128 | Civil Society + Public Media   | 0.18  | Civil Society + Public Media   | 0.195 |
| US Overall                     | 0.156 | Sweden Overall                 | 0.16  | France Overall                 | 0.152 |
